# Supplementary material
Source: PubMed Central journal article supplement (PMC5860937)
Supplement: NIHMS907185-supplement-Supplement.pdf [file NIHMS907185-supplement-Supplement.pdf]

1  
2  
3  
4  
5  
6  
7  
8  
9  
10  
11  
12  
13  
14  
15

**Online Repository Materials**

**Th1 Cells and Atypical Cytokine Signatures Are Present in the Lower Airways of Children with Severe Asthma, Regardless of Allergic Status.**

Julia A. Wisniewski, MD<sup>1,2\*</sup>, Lyndsey M. Muehling, MS<sup>1\*</sup>, Jacob D. Eccles, BA<sup>1</sup>, Brian J. Capaldo, PhD<sup>3</sup>, Rachana Agrawal, PhD<sup>1</sup>, Debbie-Ann Shirley, MD, MPH<sup>2</sup>, James T. Patrie, MS<sup>4</sup>, Lisa J. Workman BA<sup>1</sup>, Alexander J. Schuyler, BS, BA<sup>1</sup>, Monica G. Lawrence, MD<sup>1</sup>, W. Gerald Teague, MD<sup>2</sup>, Judith A. Woodfolk, MBChB, PhD<sup>1</sup>.

*\* Authors contributed equally to the manuscript.*

<sup>1</sup>Department of Medicine, <sup>2</sup>Department of Pediatrics, and <sup>3</sup>Department of Microbiology, Immunology and Cancer Biology, <sup>4</sup>Department of Public Health Sciences, University of Virginia School of Medicine, Charlottesville, VA 22908, USA.

16 **Methods**

17 ***Human Subjects and Bronchoscopy.***

18 BAL fluid samples were obtained from 52 children. The indications for bronchoscopy  
19 were poorly controlled asthma despite treatment with high dose corticosteroids (**Table E1**),  
20 recurrent health care access for care, and recurrent or persistent abnormality on chest film.  
21 Participants received specialty care at a regional academic center, and treatment was adjusted  
22 by a senior clinician. Adherence to treatment was confirmed by analysis of prescription re-fill  
23 pharmacy records, and inhaled medication technique was evaluated regularly in the clinic. Oral  
24 corticosteroid usage was obtained from medical record electronic monitoring. Participants were  
25 treated with asthma control medications per the EP-3 guidelines with treatment adjusted in  
26 follow up visits to the clinic according to the level of symptom control and lung function.  
27 Bronchoscopies were done under conscious sedation or general anesthesia via a laryngeal  
28 mask airway trans-orally inserted to avoid contamination via the nasopharynx.

29 ***Serum Antibody Assays.***

30 Serum total IgE and specific IgE (dust mite (*Dermatophagoides pteronyssinus*), cat, egg,  
31 cow's milk, peanut, ryegrass, ragweed, *Alternaria alternata*, and *Aspergillus fumigatus*) were  
32 measured by ImmunoCAP assay (Phadia US, Portage, MI) using the ImmunoCAP 250 system.  
33 Allergic status was assigned based on the presence of specific IgE using a low assay threshold  
34 ( $>0.1\text{kU}_A/\text{L}$ ,  $n=37$ ) or elevated total IgE according to age ( $>50\text{ IU/ml}$  for children  $\leq 5\text{ yrs.}$ ,  $n=1$ ).  
35 Serum IgG and IgA antibodies were measured by the University of Virginia Medical Laboratories  
36 using Rate Nephelometry (IMMAGE<sup>R</sup> 800 Immunochemistry System, Beckman Coulter).

37 ***Detection of Respiratory Microbes.***

38 Bacteria were detected by culture and respiratory viruses were assessed by multiplex  
39 PCR analysis for the following: Influenza A, subtype seasonal H1 or seasonal H3; Influenza B;  
40 Parainfluenza 1,2,3; Metapneumovirus; Rhinovirus/Enterovirus; Adenovirus; and Respiratory  
41 Syncytial Virus subtypes A and B. Tests were performed through the University of Virginia  
42 Medical Laboratories.

43 **Flow Cytometry Antibodies and Other Reagents.**

44 Mouse IgG used to block Fc receptors prior to cell staining was obtained from Lampire  
45 Biological Laboratories (Pipersville, PA). Antibodies used to identify cell populations, including  
46 lineage cocktails, are listed in **Table EII**. Fixable Aqua Live/Dead Staining Kit was obtained from  
47 Invitrogen (Eugene, OR).

48 **Flow Cytometry Analysis.**

49 To detect intracellular cytokines in ILCs and T cells and ILCs, cells were restimulated  
50 with phorbol 12-myristate 13-acetate (50ng/ml; Fisher Scientific) and 2µg/ml ionomycin  
51 (Invitrogen) in the presence of Brefeldin A (BD Biosciences) for 4 hours (E1). Cells were then  
52 stained for surface and intracellular markers and analyzed using an LSRII flow cytometer (BD  
53 Biosciences). Dead cells were excluded by Aqua staining. For all multicolor analyses,  
54 compensation controls (single stains, 1 for each fluorochrome) and gating controls (cells stained  
55 with all reagents minus 1) were included (E2, E3). To analyze T-cell populations, a lineage  
56 cocktail was used to exclude CD14<sup>+</sup> monocytes, CD16<sup>+</sup> NK cells, and CD19<sup>+</sup> B cells. After  
57 counterstaining for CD8, live CD3<sup>+</sup>CD8<sup>-</sup> T cells were analyzed in fresh BAL and PBMC  
58 specimens in order to capture total CD4<sup>+</sup> T cell events (**Fig. E3**)(E1, E4, E5). Staining for CD4  
59 confirmed the identity of CD4<sup>+</sup> T cells. Basophils, mDC and pDC were identified within lineage-  
60 negative CD3-negative cells based on differential expression of HLA-DR and CD123 as follows:  
61 basophils (HLA-DR<sup>-</sup>CD123<sup>+</sup>), mDC (HLA-DR<sup>+</sup>CD123<sup>mid</sup> and HLA-DR<sup>+</sup>CD123<sup>neg</sup>), and pDC (HLA-  
62 DR<sup>+</sup>CD123<sup>+</sup>)(**Fig. E8**). ILCs were identified within lineage-negative CD3-negative CD4-negative  
63 cells, based on a CD45<sup>hi</sup>CD127<sup>+</sup> phenotype. ILC2s were defined as those ILCs positive for IL-4  
64 and/or IL-13 based on FMO controls (**Fig. E8**). The Th2 lineage-defining transcription factor  
65 GATA-3 was not used to identify ILC2s, based on its downregulation in a Th1-associated  
66 inflammatory milieu (E6).

67 **Cytometric Bead Assay for Secreted Cytokines.**

68 Cytokines included in the cytometric bead assay (Millipore, Billerica, MA) included 25

69 markers: IL-1 $\beta$ , IL-2, IL-4, IL-5, IL-6, IL-9, IL-10, IL-12, IL-13, IL-15, IL-17A, IL-17E, IL-17F, IL-  
70 21, IL-22, IL-23, IL-27, IL-28A (IFN- $\lambda$ 2), IL-31, IL-33, IFN- $\gamma$ , GM-CSF, MIP-3 $\alpha$ , TNF- $\alpha$  and TNF-  
71  $\beta$ .

## 72 **Statistical Analysis.**

73 Differences in cell numbers or percentages were analyzed within groups by the  
74 nonparametric Wilcoxon rank sign test for paired data, and between groups by the 2 sample  
75 Wilcoxon rank sum test. Owing to the limited sample size, allergy was evaluated as a  
76 continuous variable, as judged by serum total IgE. Associations between cell  
77 percentages/ratios, total IgE, age and ICS dose, were examined using univariate and  
78 multivariate Spearman correlations. In the multivariate setting, partial correlations were  
79 determined after adjustment for age, ICS dose and total IgE where applicable. Between group  
80 differences in the prevalence of IgE and antibody levels were analyzed by chi-square test and  
81 Mann-Whitney *U* test respectively. Heat maps for secreted cytokines were generated as  
82 follows: samples were assayed in at least duplicates and computed concentrations were  
83 averaged prior to plotting. Unsupervised hierarchical clustering was performed for samples  
84 using Euclidean distance and average linkage, and for cytokines using correlation distance and  
85 average linkage. For linear mixed-effects modeling, MFI values were used to assess differential  
86 expression of cytokines because of the increased sensitivity compared to using derived  
87 concentration values (E7, E8). Background corrected median fluorescence intensity (MFI)  
88 values were obtained from the luminex csv files and imported into the R statistical programming  
89 environment (version 3.3) (E9). MFI values were log<sub>10</sub> transformed and the MFI values from  
90 the standards and quality control beads for each assay run were used to remove batch effects  
91 between different assays. Linear models for each cytokine were generated using batch  
92 corrected MFI values and subject source was treated as a random effect to account for variation  
93 between subjects. The R package Limma was used to remove batch effects and implement the  
94 linear models (E10). Moderated t tests were used to determine the significance of differential

95 expression between groups examined. Owing to the lack of previous data, no power calculation  
96 was performed.

97 **Figure Legends**

98 **Figure E1. Serum Antibodies and Neutrophil Counts in BAL Fluid of Children with Severe**

99 **Asthma. (A)** Serum IgE, IgA and IgG levels among asthmatic children according to bacterial

100 culture status. Closed symbols denote children >6 years of age and open symbols denote

101 children 6 months to 6 years of age. Bars denote geometric means with 95% confidence

102 intervals. Grey boxes denote the range of normal antibody levels across all ages >6 months.

103 **(B)** Neutrophil counts in BAL fluid (% of total cells). No neutrophils were detected in 3

104 specimens. NS, not significant.

105

106 **Figure E2. Specimens Available for Flow Cytometry Studies and Luminex Cytokine**

107 **Assays. (A)** Numbers of specimens available for analysis. **(B)** Comparison of the

108 characteristics of children included in flow cytometry studies with the asthma cohort.

109

110 **Figure E3. Gating Strategy and Surface Signature of T Cells in Blood and BAL Fluid of**

111 **Asthmatic Children. (A)** CD4<sup>+</sup> T cells were identified by gating on live CD3<sup>+</sup> T cells after

112 excluding B cells, monocytes, NK cells, and CD8<sup>+</sup> T cells by counterstaining with anti-CD19,

113 anti-CD14, anti-CD16 antibodies, and anti-CD8 antibodies. The presence of CD8<sup>+</sup> T cells was

114 confirmed based on a CD3<sup>+</sup>CD8<sup>+</sup> signature. **(B)** Percentages of CD4<sup>+</sup> and CD8<sup>+</sup> T cells within

115 total live T cells in BAL fluid from asthmatic subjects. **(C)** Comparison of the percentage of total

116 CD8<sup>+</sup> T cells expressing CD45RO and CCR5 in blood and BAL fluid specimens obtained within

117 the same subject. \*\*\*\*p<0.0001.

118

119 **Figure E4. Expression of IL-4 and IFN- $\gamma$  in CD4<sup>+</sup> and CD8<sup>+</sup> T Cells in BAL Fluid.**

120 Representative plots are shown for CD4<sup>+</sup> T cells (A) and CD8<sup>+</sup> T cells (B) in 3 asthmatic

121 subjects across a broad range of serum total IgE levels.

122

123 **Figure E5. T-Cell Skewing in Relation to Age and Inhaled Corticosteroid Dose.**

124 Correlation between the percentages and ratio of cytokine-positive CD4<sup>+</sup> T-cell types in BAL  
125 fluid with age (A) and inhaled corticosteroid dose (B). Th1/Th2 ratio was defined as the ratio of  
126 total IFN- $\gamma$ <sup>+</sup> to total Th2 (IL-4<sup>+</sup>and/or IL-5<sup>+</sup>) cells. in BAL fluid. Univariate and partial  
127 (parentheses) correlation values adjusted for total IgE and inhaled corticosteroid dose (A) and  
128 age and total IgE (B). A, allergic; NA, non-allergic.

129

130 **Figure E6. Comparison of Cytokine Profiles In BAL Fluid Obtained from Different Lung**

131 **Regions.** BAL specimens were obtained from different lung regions in 20 asthmatics. Heat  
132 maps were positioned side by side to visualize variations in cytokine profiles between lung  
133 regions. Green bars at the top of the heat map denote specimens from allergic subjects. LLL,  
134 left lower lobe; RLL, right lower lobe; LUL, left upper lobe; RUL, right upper lobe; RML, right  
135 middle lobe; LING, lingular lobe.

136

137 **Figure E7. Relationship Between IL-5 Levels in BAL Fluid and Eosinophils. (A)**

138 Correlation between IL-5 levels and blood eosinophil counts in 67 BAL specimens from 47  
139 subjects. **(B)** IL-5 levels in subjects with and without detectable eosinophils in BAL fluid. Black  
140 and blue symbols denote allergic and non-allergic subjects respectively. The filled symbols  
141 denote specimens obtained from different lung regions within the same subject, with each  
142 shape representing a different subject.

143

144 **Figure E8. Identification of Type 2 Innate Lymphoid Cells in BAL Fluid. (A)** Gating

145 strategy for ILC2s. An extensive cocktail of antibodies was used to exclude lineage-positive  
146 cells and type 1 innate lymphoid cells based on the following markers: CD8, CD14, CD16,  
147 CD19, CD36, CD56, CD123, TCR $\gamma/\delta$ , CD235a. Further exclusion of CD4<sup>+</sup> T cells yielded  
148 CD45<sup>hi</sup>CD127<sup>+</sup> innate lymphoid cells. **(B)** Percentages of ILC2s (IL-4<sup>+</sup>/IL-13<sup>+</sup>) within total live  
149 single-cell events in BAL fluid obtained from 7 asthmatics. **(C)** Representative scatter plots  
150 showing intracellular cytokine expression in innate lymphoid cells from one allergic and one

151 non-allergic subject. Red dots denote cells expressing IL-4 or IL-13, or both. Inset plots show  
152 fluorescence minus one (FMO) controls for IL-4<sup>+</sup> and IL-13<sup>+</sup> cells using PBMCs from an allergic  
153 subject. **(D)** Expression of the ILC2 marker CRTH2 on IL4<sup>+</sup>/IL13<sup>+</sup> innate lymphoid cells (red  
154 histogram) compared with IL-4<sup>neg</sup>/IL-13<sup>neg</sup> innate lymphoid cells (blue histogram) and FMO (grey  
155 histogram).

156

157 **Figure E9. Gating Strategy and Phenotypic Characteristics of Dendritic Cells and**  
158 **Basophils in BAL Fluid. (A)** Gating strategy used to identify basophils and DC subsets. After  
159 excluding cells expressing other lineage markers, cell populations were identified based on  
160 differential expression of HLA-DR and CD123 as follows: basophils (HLA-DR<sup>-</sup>CD123<sup>+</sup>), mDC  
161 (HLA-DR<sup>+</sup>CD123<sup>neg/mid</sup>), and pDC (HLA-DR<sup>+</sup>CD123<sup>hi</sup>). **(B)** Representative histograms showing  
162 expression of characteristic markers on basophils (FcεRI), mDC (CD11c) and pDC (CD303) in  
163 blood and BAL.



164 **References**

- 165 E1. Wisniewski JA, Commins SP, Agrawal R, Hulse KE, Yu MD, Cronin J, Heymann PW,  
166 Pomes A, Platts-Mills TA, Workman L, Woodfolk JA. Analysis of cytokine production by  
167 peanut-reactive T cells identifies residual Th2 effectors in highly allergic children who  
168 received peanut oral immunotherapy. *Clin Exp Allergy* 2015; 45: 1201-1213.
- 169 E2. Baumgarth N, Roederer M. A practical approach to multicolor flow cytometry for  
170 immunophenotyping. *J Immunol Methods* 2000; 243: 77-97.
- 171 E3. Maecker HT, Trotter J. Flow cytometry controls, instrument setup, and the determination  
172 of positivity. *Cytometry A* 2006; 69: 1037-1042.
- 173 E4. Moller BK, Andresen BS, Christensen EI, Petersen CM. Surface membrane CD4  
174 turnover in phorbol ester stimulated T-lymphocytes. Evidence of degradation and  
175 increased synthesis. *FEBS Lett* 1990; 276: 59-62.
- 176 E5. Mao JH, Chen ZM, Tang YM, Liang L, Du LZ, Zhang Y. Regulation of CD3, CD4 and  
177 CD8 expressions on PMA-activated human peripheral T cells. *Zhejiang Da Xue Xue Bao*  
178 *Yi Xue Ban* 2004; 33: 155-159.
- 179 E6. Silver JS, Kearley J, Copenhaver AM, Sanden C, Mori M, Yu L, Pritchard GH, Berlin AA,  
180 Hunter CA, Bowler R, Erjefalt JS, Kolbeck R, Humbles AA. Inflammatory triggers  
181 associated with exacerbations of COPD orchestrate plasticity of group 2 innate lymphoid  
182 cells in the lungs. *Nat Immunol* 2016; 17: 626-35.
- 183 E7. Clarke DC, Morris MK, Lauffenburger DA. Normalization and statistical analysis of  
184 multiplexed bead-based immunoassay data using mixed-effects modeling. *Mol Cell*  
185 *Proteomics* 2013; 12: 245-262.
- 186 E8. Won JH, Goldberger O, Shen-Orr SS, Davis MM, Olshen RA. Significance analysis of  
187 xMap cytokine bead arrays. *Proc Natl Acad Sci U S A* 2012; 109: 2848-2853.
- 188 E9. R Core Team. R: A language and environment for statistical computing. R Foundation  
189 for Statistical Computing, Vienna, Austria. URL <https://www.R-project.org/> 2016.

- 190 E10. Ritchie ME, Phipson B, Wu D, Hu Y, Law CW, Shi W, Smyth GK. Limma powers  
191 differential expression analyses for RNA-sequencing and microarray studies. *Nucleic  
192 Acids Res* 2015; 43: e47.
- 193 E11. Guilbert TW, Morgan WJ, Krawiec M, Lemanske RF, Jr., Sorkness C, Szeffler SJ, Larsen  
194 G, Spahn JD, Zeiger RS, Heldt G, Strunk RC, Bacharier LB, Bloomberg GR, Chinchilli  
195 VM, Boehmer SJ, Mauger EA, Mauger DT, Taussig LM, Martinez FD, Prevention of  
196 Early Asthma in Kids Study, Childhood Asthma Research and Education Network. The  
197 Prevention of Early Asthma in Kids study: design, rationale and methods for the  
198 Childhood Asthma Research and Education network. *Control Clin Trials* 2004; 25: 286-  
199 310.
- 200 E11. Castro-Rodriguez JA, Holberg CJ, Wright AL, Martinez FD. A clinical index to define risk  
201 of asthma in young children with recurrent wheezing. *Am J Respir Crit Care Med* 2000;  
202 162: 1403-1406.
- 203 E12. Chung KF, Wenzel SE, Brozek JL, Bush A, Castro M, Sterk PJ, Adcock IM, Bateman  
204 ED, Bel EH, Bleecker ER, Boulet LP, Brightling C, Chanez P, Dahlen SE, Djukanovic R,  
205 Frey U, Gaga M, Gibson P, Hamid Q, Jajour NN, Mauad T, Sorkness RL, Teague WG.  
206 International ERS/ATS guidelines on definition, evaluation and treatment of severe  
207 asthma. *Eur Respir J* 2014; 43: 343-373.

**Table E1**  
**Asthma Definitions, Severity Assignment, and Symptom Control by Age**

| <b>Asthma Definitions</b>                                                                                                                                                                                                                                                                                                                   |                                                                                                                                                                                                                                                                                                                                                                                                                                                                                          |
|---------------------------------------------------------------------------------------------------------------------------------------------------------------------------------------------------------------------------------------------------------------------------------------------------------------------------------------------|------------------------------------------------------------------------------------------------------------------------------------------------------------------------------------------------------------------------------------------------------------------------------------------------------------------------------------------------------------------------------------------------------------------------------------------------------------------------------------------|
| Pre-school (6 months to 5 years); all present: <ul style="list-style-type: none"> <li>• Recurrent episodes of cough, wheeze, and respiratory distress.</li> <li>• Current asthma medications</li> <li>• Positive modified asthma predictive index (E10, E11)</li> </ul>                                                                     | School-age and Adolescent (6 -17 years); all present: <ul style="list-style-type: none"> <li>• Physician diagnosis</li> <li>• Current asthma medications</li> <li>• Airflow limitation present and/or a <math>\geq 12\%</math> increase in FEV<sub>1</sub> % predicted after bronchodilator.</li> </ul>                                                                                                                                                                                  |
| <b>Severe Asthma Definitions</b>                                                                                                                                                                                                                                                                                                            |                                                                                                                                                                                                                                                                                                                                                                                                                                                                                          |
| Pre-school <ul style="list-style-type: none"> <li>• Modification of the ERS/ATS definition as asthma requiring treatment with high-dose ICS + a second controller:               <ul style="list-style-type: none"> <li>- <math>\geq 160</math> mcg/day fluticasone equivalents</li> <li>- 2<sup>nd</sup> controller</li> </ul> </li> </ul> | School-Age and Adolescent <ul style="list-style-type: none"> <li>• Asthma requiring treatment with high dose ICS plus a second controller (and/or systemic corticosteroids) to prevent it from becoming un-controlled despite this therapy (E12).</li> </ul> High-dose ICS thresholds: <ul style="list-style-type: none"> <li>- 6-11 years <math>\geq 440</math> mcg/day fluticasone equivalents</li> <li>- 12-17 years <math>\geq 880</math> mcg/day fluticasone equivalents</li> </ul> |
| <b>Poor Symptom Control Definitions</b>                                                                                                                                                                                                                                                                                                     |                                                                                                                                                                                                                                                                                                                                                                                                                                                                                          |
| Pre-school <ul style="list-style-type: none"> <li>• Prolonged respiratory symptoms for &gt; 3 days on 3 or more occasions in the previous calendar year</li> </ul>                                                                                                                                                                          | School-Age and Adolescent (any one) <ul style="list-style-type: none"> <li>• Score &lt; 20 units on the ACT/cACT validated asthma control questionnaire.</li> <li>• 2 or more prednisone bursts in the previous calendar year</li> <li>• Recurrent un-scheduled health care access for asthma treatment.</li> </ul>                                                                                                                                                                      |

**Table EII. List of Flow Cytometry Antibodies.**

| Marker                                                                            | Fluorochrome | Source (Clone <sup>1</sup> )                |
|-----------------------------------------------------------------------------------|--------------|---------------------------------------------|
| CD3                                                                               | Alexa 700    | BD (UCHT1)                                  |
|                                                                                   | APC-H7       | BD (UCHT1)                                  |
|                                                                                   | APC-H7       | BD (SK7)                                    |
|                                                                                   | PE-Cy7       | BioLegend (SK7)                             |
| CD4                                                                               | PerCP        | Invitrogen (S3.5)                           |
|                                                                                   | PE-Cy5       | BD (RPA-T4)                                 |
|                                                                                   | BB515        | BD (RPA-T4)                                 |
| CD8                                                                               | FITC         | Invitrogen (3B5)                            |
| CD11c                                                                             | PE           | BD (B-ly6)                                  |
| CD45                                                                              | PerCP        | BioLegend (2D1)                             |
| CD45RA                                                                            | PerCP-eF710  | eBioscience (GRT22)                         |
| CD45RO                                                                            | PB/eFlur 700 | BioLegend (UCHL1)                           |
|                                                                                   | PerCP-eF710  | eBioscience (UCHL1)                         |
| CD123                                                                             | PerCP Cy5.5  | eBioscience (6H6)                           |
| CD127                                                                             | PE-Dazzle    | BioLegend (A019D5)                          |
| CD303a                                                                            | PECy7        | eBioscience (201A)                          |
| CCR5                                                                              | PECy7        | BD (2D7)                                    |
| CRTH2                                                                             | BV421        | BioLegend (BM16)                            |
| ICOS                                                                              | BV650        | BD (DX29)                                   |
| CD161                                                                             | BV785        | BioLegend (HP-3G10)                         |
| Lineage cocktail (CD14, CD16, CD19)                                               | PETR         | Invitrogen (TuK4, 3G8, SJ25-C1)             |
| Lineage cocktail (CD14, CD19)                                                     | PerCP        | BD (MΦP9, SJ25C1)                           |
| Lineage cocktail (CD8, CD14, CD15, CD16, CD19, CD36, CD56, CD123, TCRγ/δ, CD235a) | Biotin       | Miltenyi Biotec (CD4+ T-Cell Isolation Kit) |
| IgE                                                                               | FITC         | KPL                                         |
| FcεRI                                                                             | PerCP        | BioLegend (AER-37)                          |
| TSLP receptor                                                                     | APC          | BioLegend (1B4)                             |
| HLA-DR                                                                            | APC Cy7      | BD (L243)                                   |

|               |                |                           |
|---------------|----------------|---------------------------|
| IL-4          | PerCP Cy5.5    | BioLegend (MP4-25D2)      |
|               | PE-Cy7         | BD (8D48)                 |
|               | BV605          | BioLegend (MP4-s5D2)      |
| IL-5          | APC            | Miltenyi (JES1-39D10)     |
| IL-13         | FITC           | eBioscience (PVM13-1)     |
|               | BV711          | BD (JES10-5A2)            |
| IL-17A        | APC-eFluor 780 | eBioscience (eBio64DEC17) |
|               | AF488          | BioLegend (BL168)         |
|               | APC-Cy7        | BioLegend (BL168)         |
| IFN- $\gamma$ | PE             | BD (4S.B3)                |
|               | AF700          | BioLegend (4S.B3)         |

<sup>1</sup>Provided where available

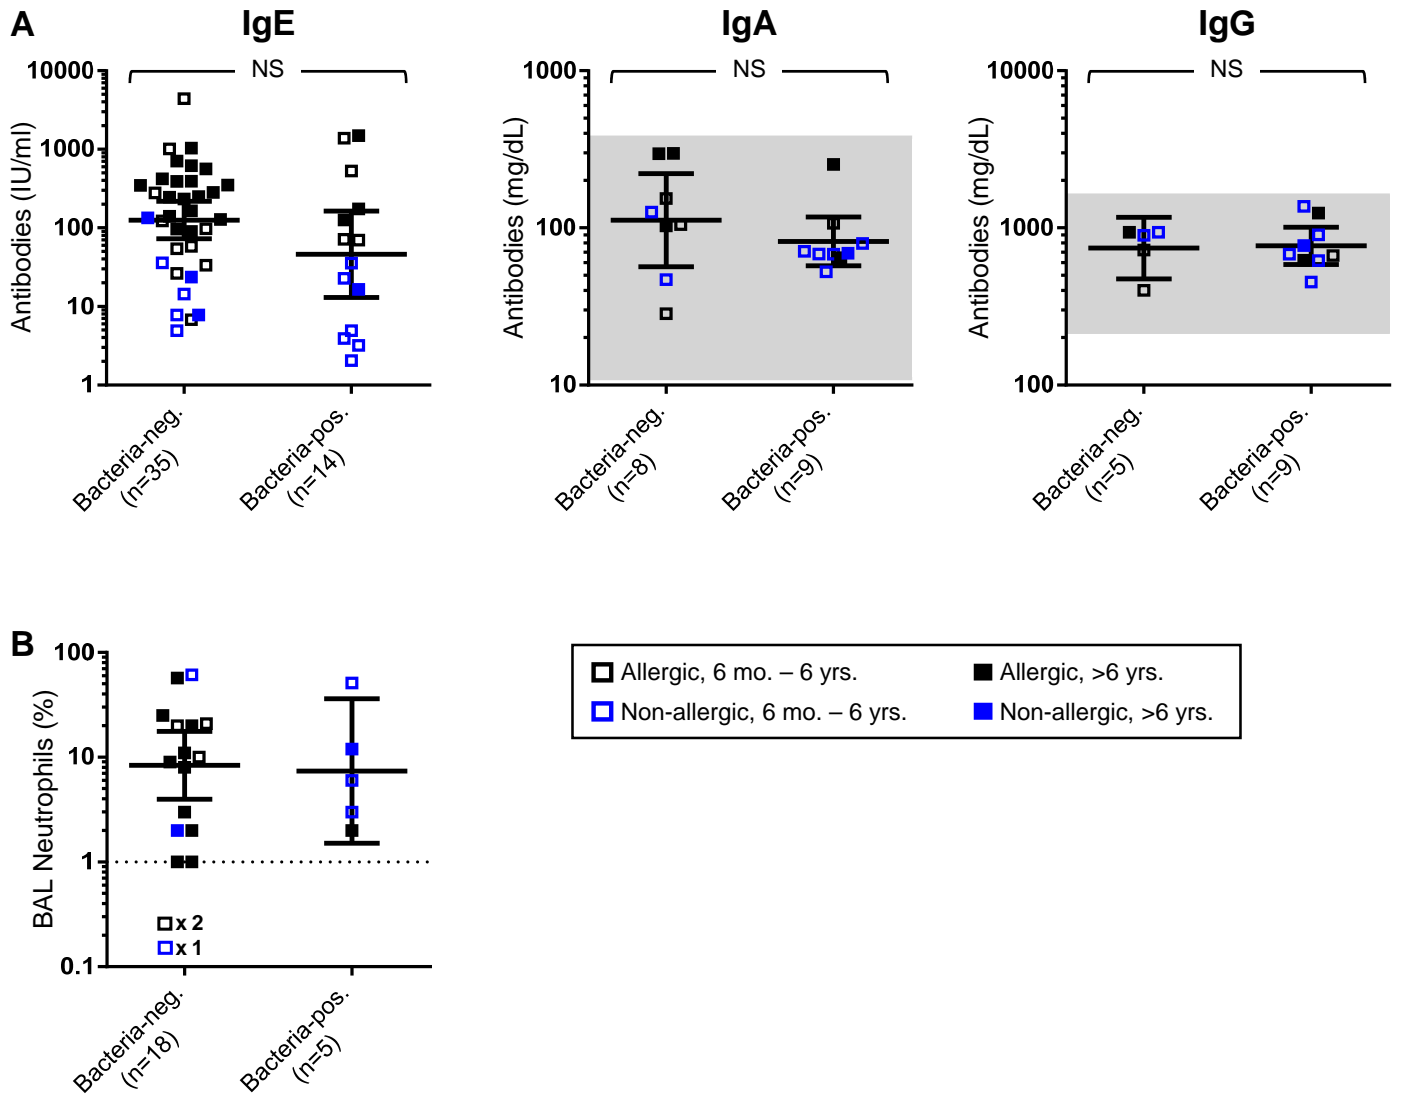

**Figure E1**

**A**

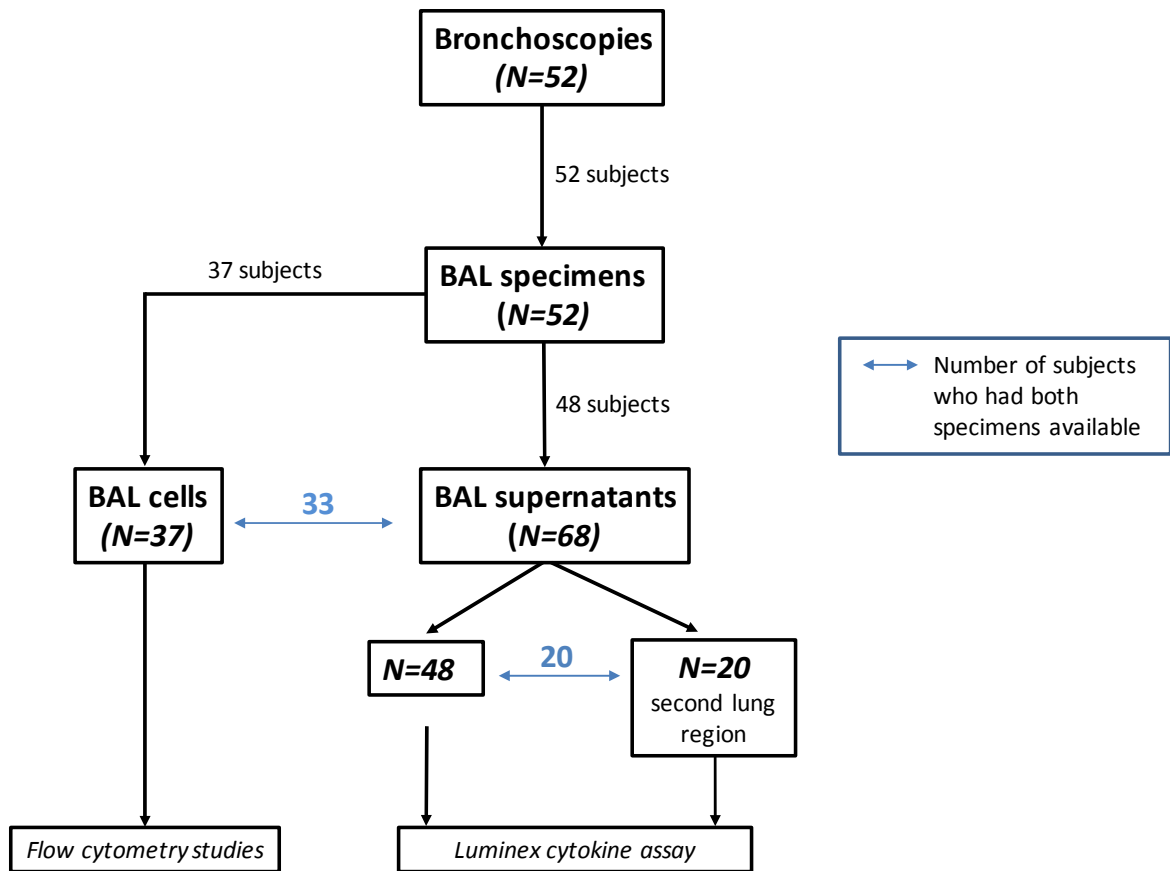

<sup>1</sup> Four subjects had no supernatants available for analysis and 15 subjects had no cells available for analysis

**B**

**Comparison of the Characteristics of Subjects Included in Flow Cytometry Studies with the Asthma Cohort.**

|                                     | Flow Cytometry Studies | Asthma Cohort | P value |
|-------------------------------------|------------------------|---------------|---------|
| Numbers of subjects                 | 37                     | 52            |         |
| Age <sup>1</sup>                    | 4.8 [3.6-6.3]          | 5.7 [4.5-7.2] | 0.26    |
| Male <sup>2</sup>                   | 65% (24/37)            | 63% (33/52)   | 0.89    |
| African American <sup>2</sup>       | 27% (10/37)            | 29% (15/52)   | 0.85    |
| Total IgE <sup>1</sup>              | 79 [40-160]            | 111 [66-188]  | 0.38    |
| ICS dose (mcg) <sup>1</sup>         | 433 [333-565]          | 479 [382-602] | 0.55    |
| EV/HRV-pos <sup>2</sup>             | 46% (16/35)            | 38% (19/50)   | 0.48    |
| Bacteria-pos <sup>2</sup>           | 34% (12/35)            | 29% (14/49)   | 0.57    |
| Fungal sensitization <sup>2,3</sup> | 27% (10/37)            | 36% (19/52)   | 0.34    |
| Allergic <sup>2,4</sup>             | 68% (25/37)            | 73% (38/52)   | 0.57    |

<sup>1</sup>Geometric mean [95% confidence interval]. <sup>2</sup>Percentage and (prevalence).

<sup>3</sup>IgE >0.1 kU<sub>A</sub>/L to *Alternaria alternata* and/or *Aspergillus fumigatus*. <sup>4</sup>IgE >0.1 kU<sub>A</sub>/L to food or inhalant allergens. EV, enterovirus; HRV, human rhinovirus.

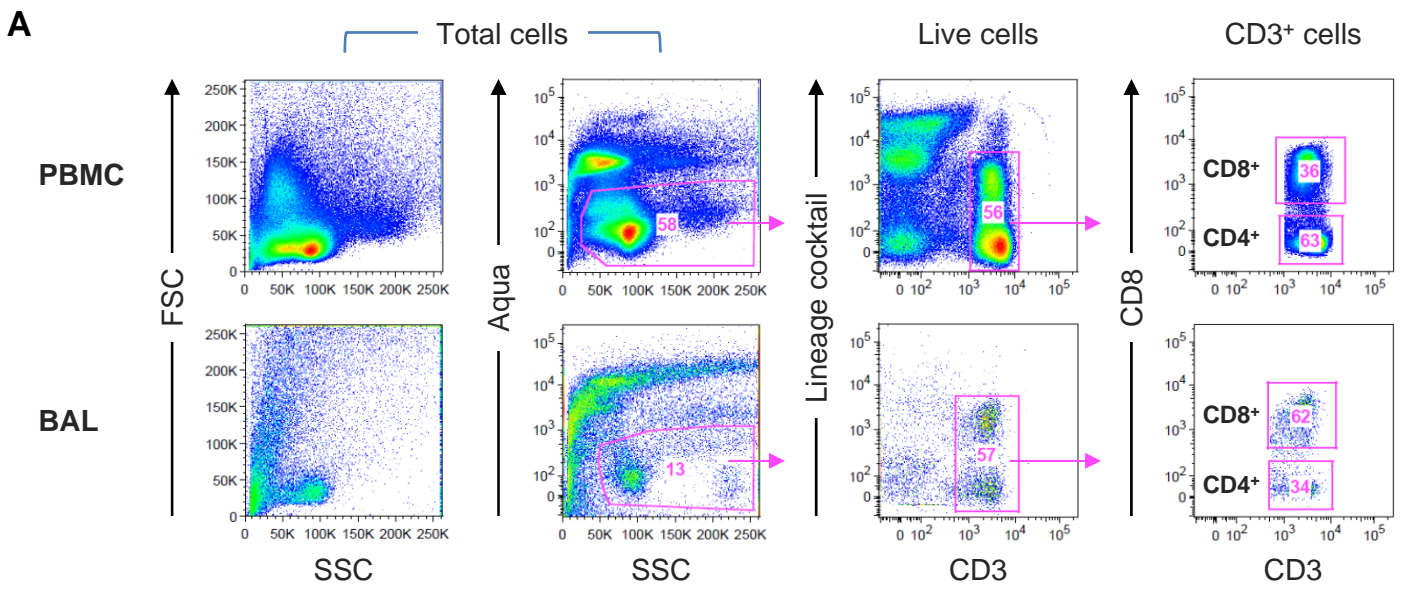

**B** Live Lymphocytes in BAL

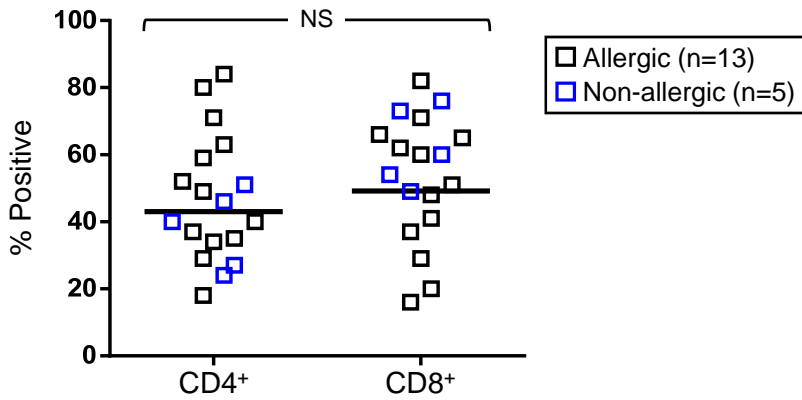

**C** CD8+ T cells

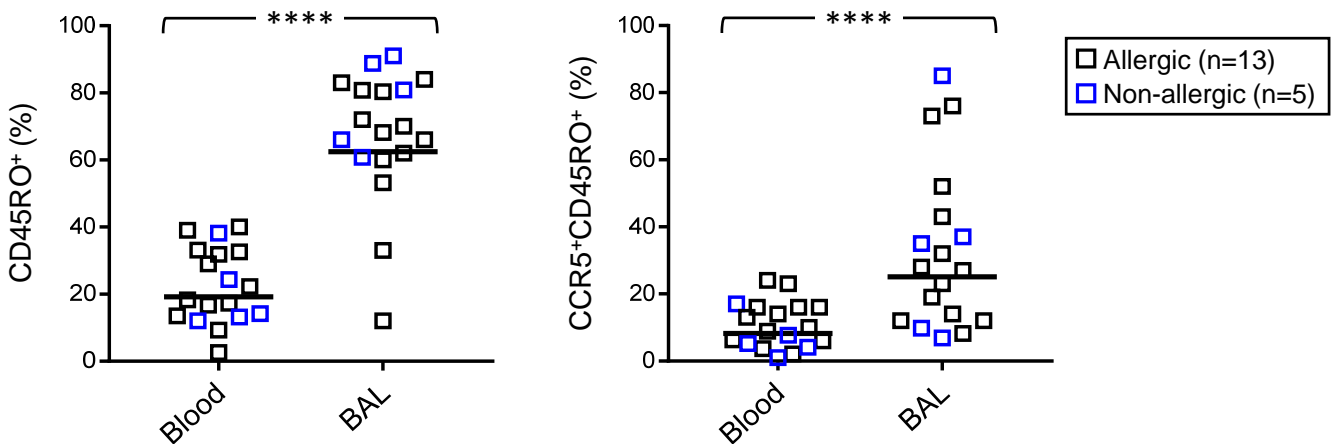

**Figure E3**



**A**  
**CD4<sup>+</sup> T cells in BAL**

Subject #10, age 3.8 yrs.  
Total IgE 3,263 IU/ml

Subject #50, age 5.4 yrs.  
Total IgE 531 IU/ml

Subject #51, age 4.3 yrs.  
Total IgE 4.9 IU/ml

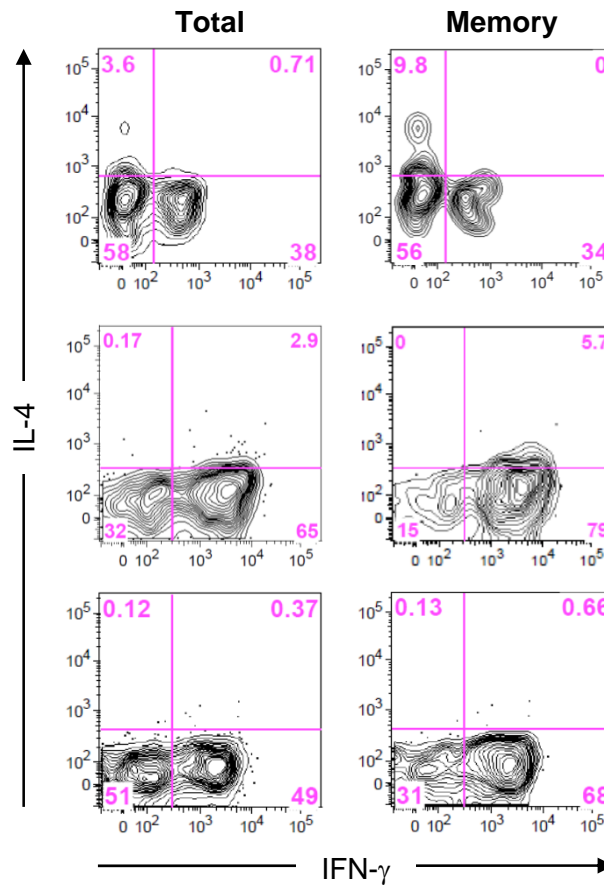

**B**  
**CD8<sup>+</sup> T cells in BAL**

Subject #10, age 3.8 yrs.  
Total IgE 3,263 IU/ml

Subject #50, age 5.4 yrs.  
Total IgE 531 IU/ml

Subject #51, age 4.3 yrs.  
Total IgE 4.9 IU/ml

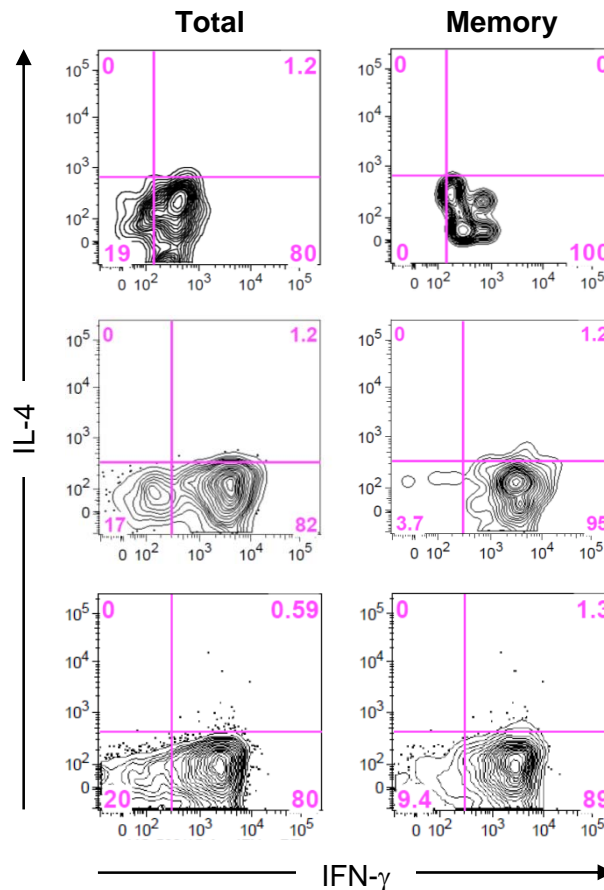

**Figure E4**

**A****CD4+ T Cells in BAL**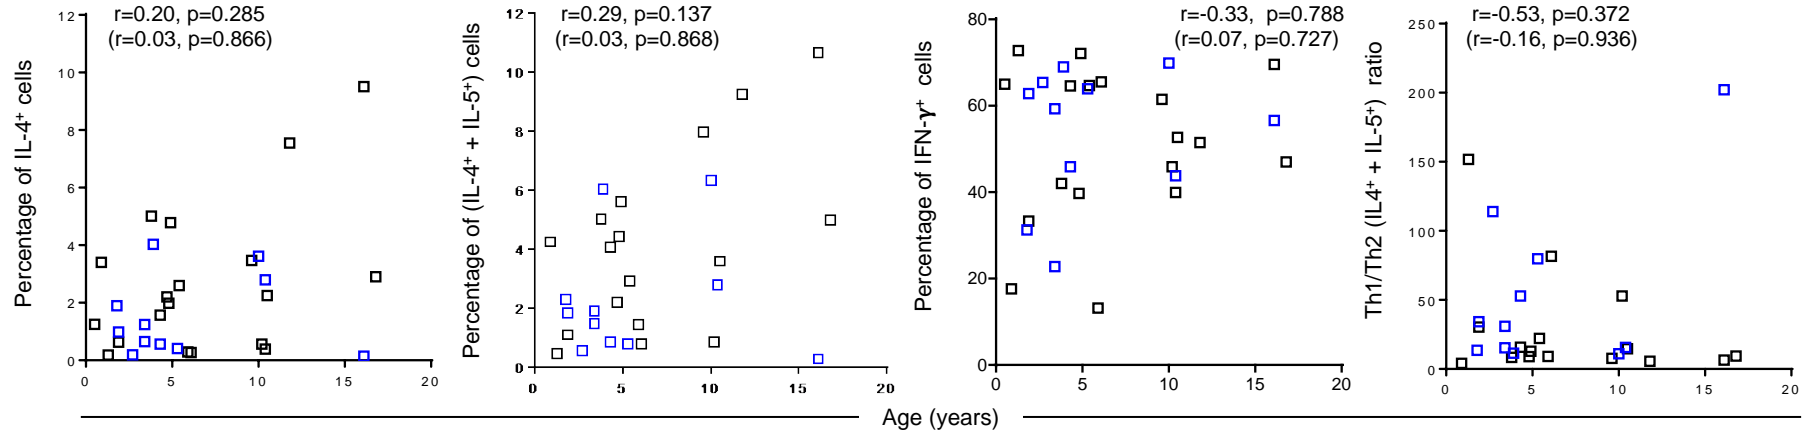**B**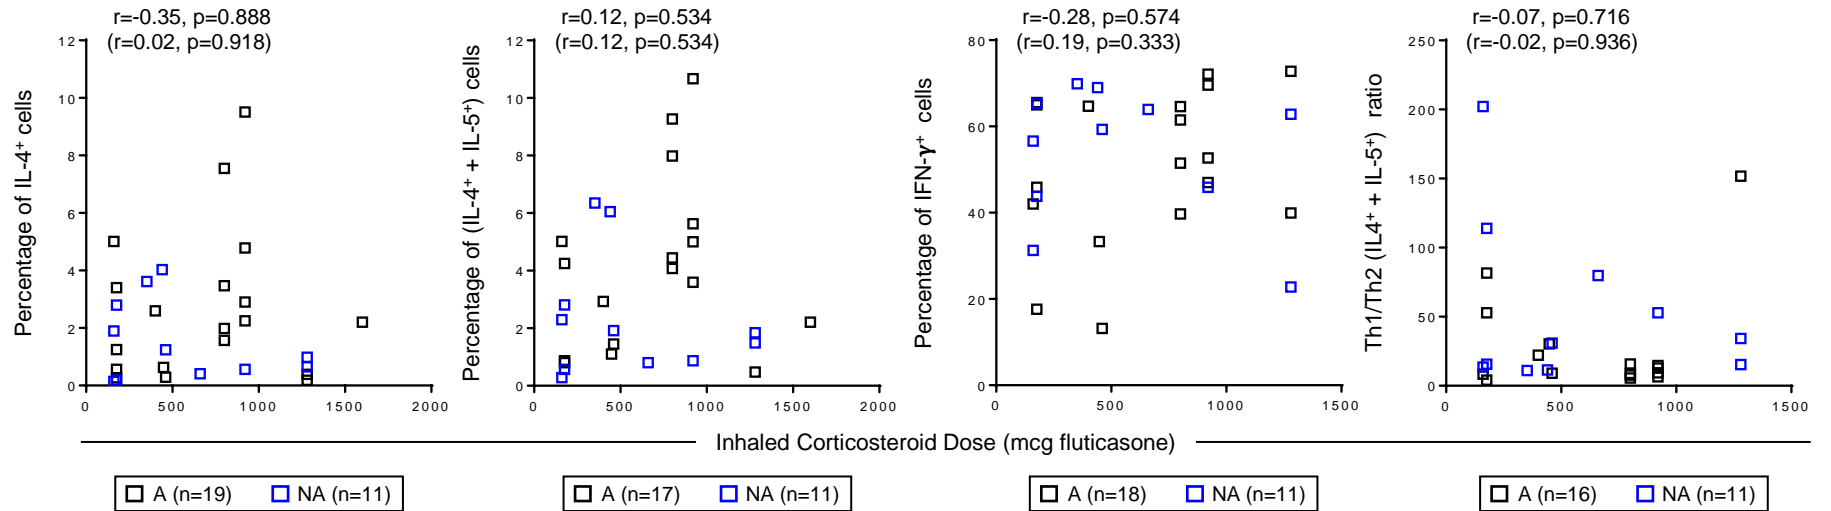**Figure E5**

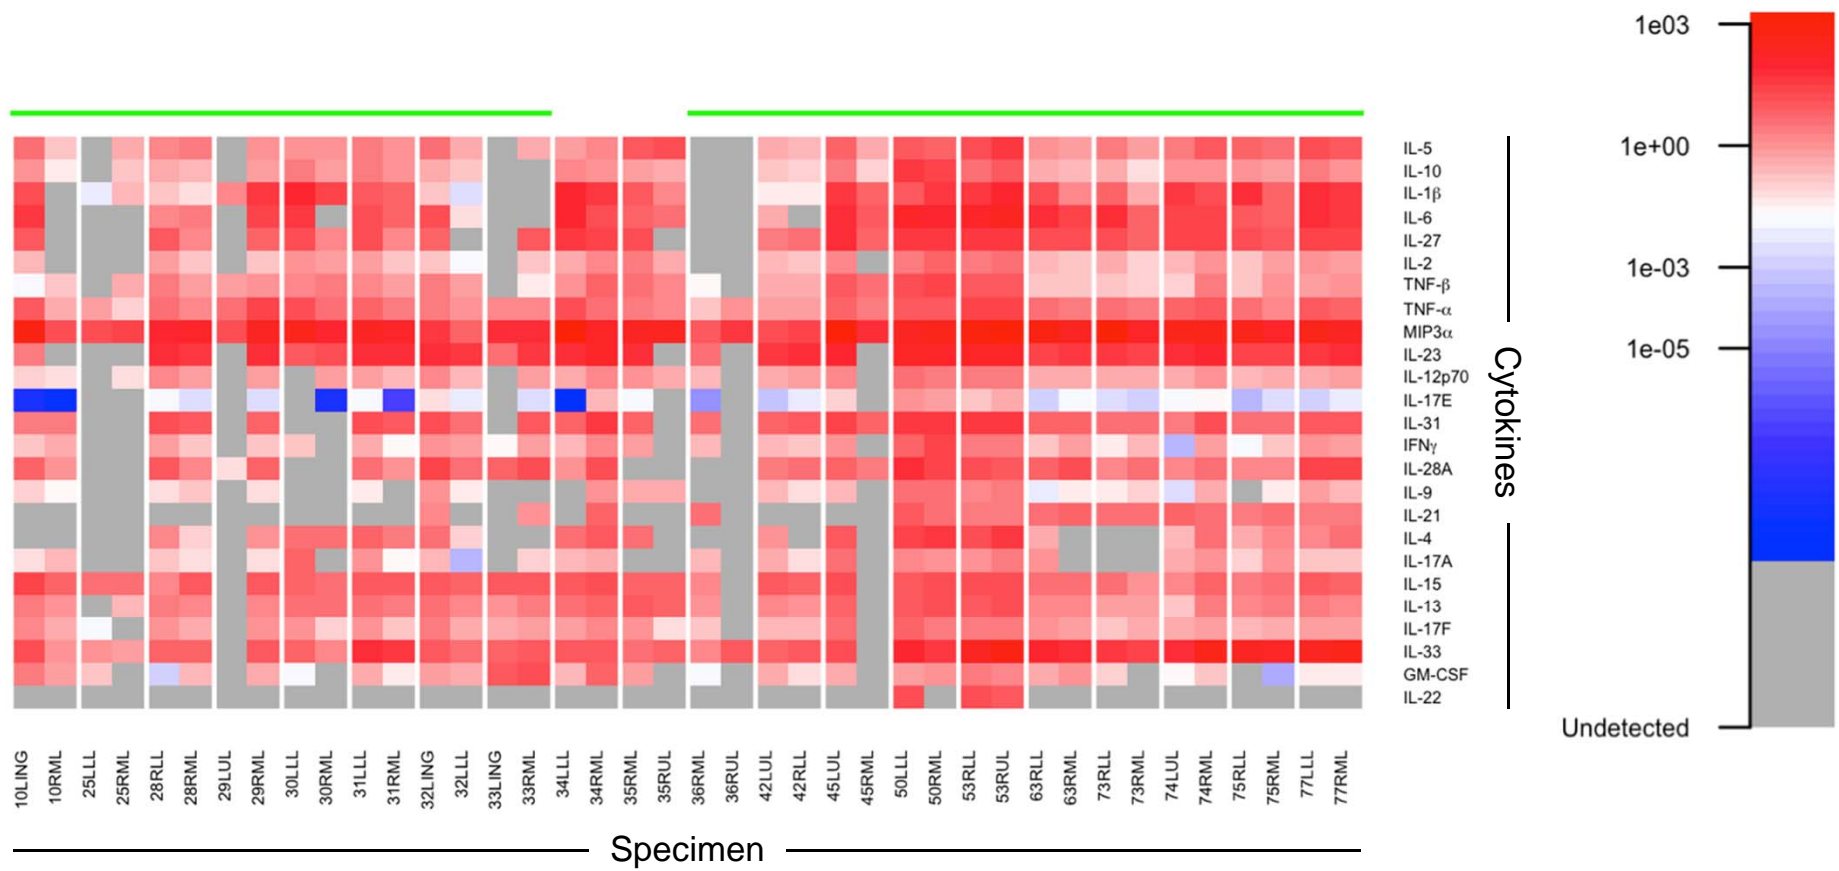

Figure E6

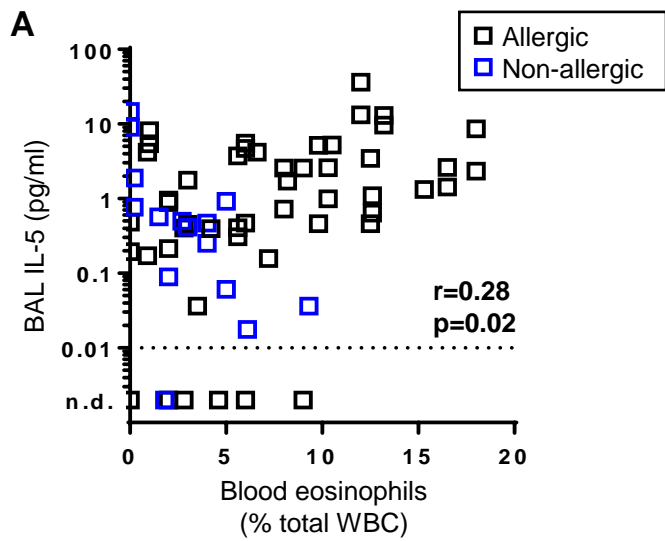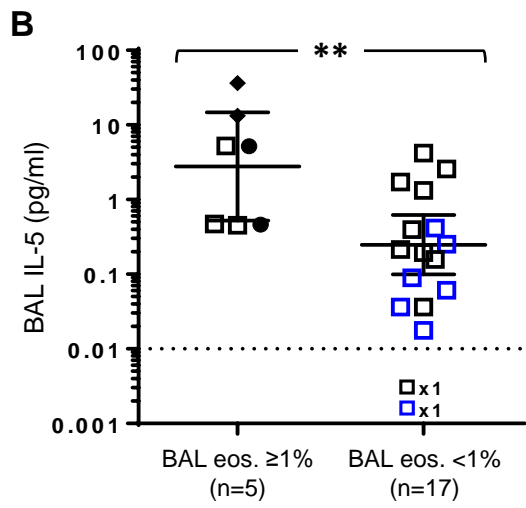

Figure E7

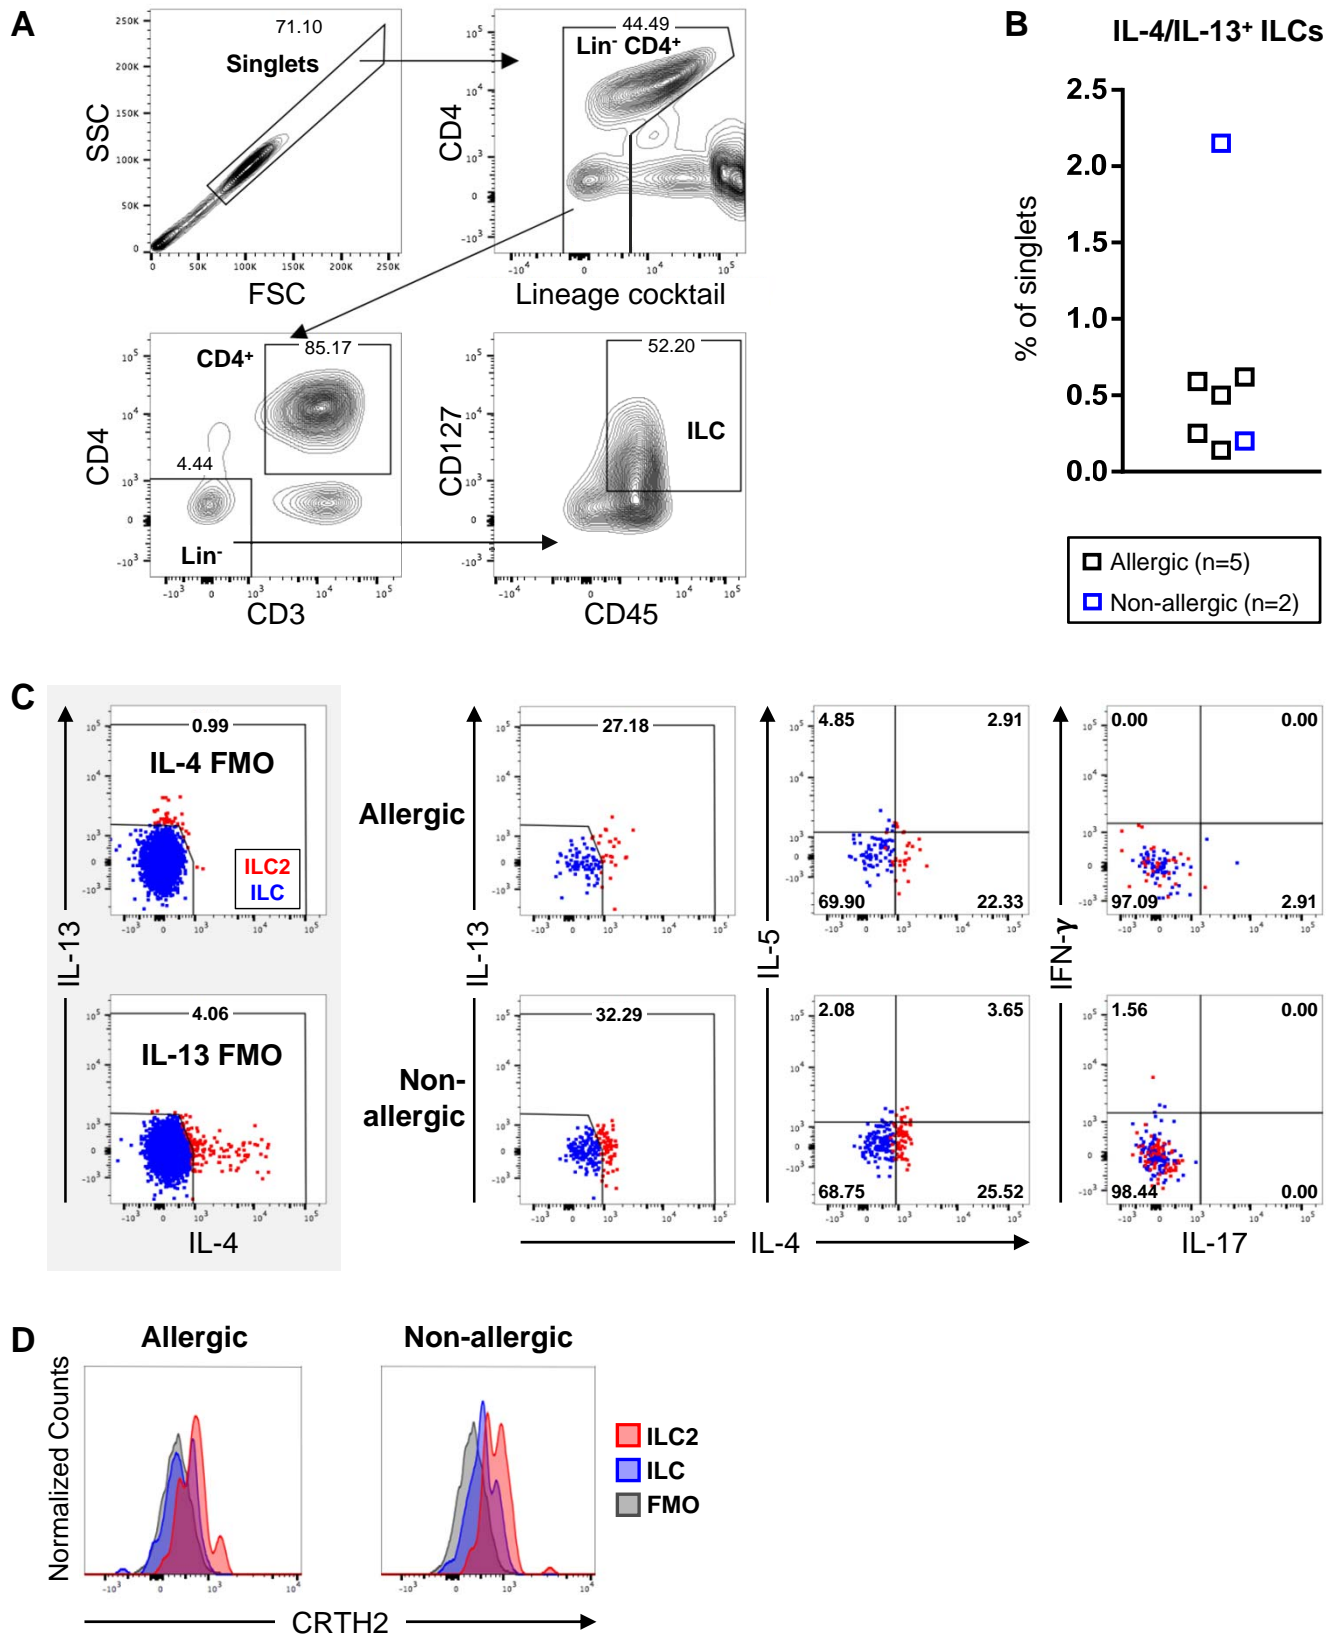

Figure E8

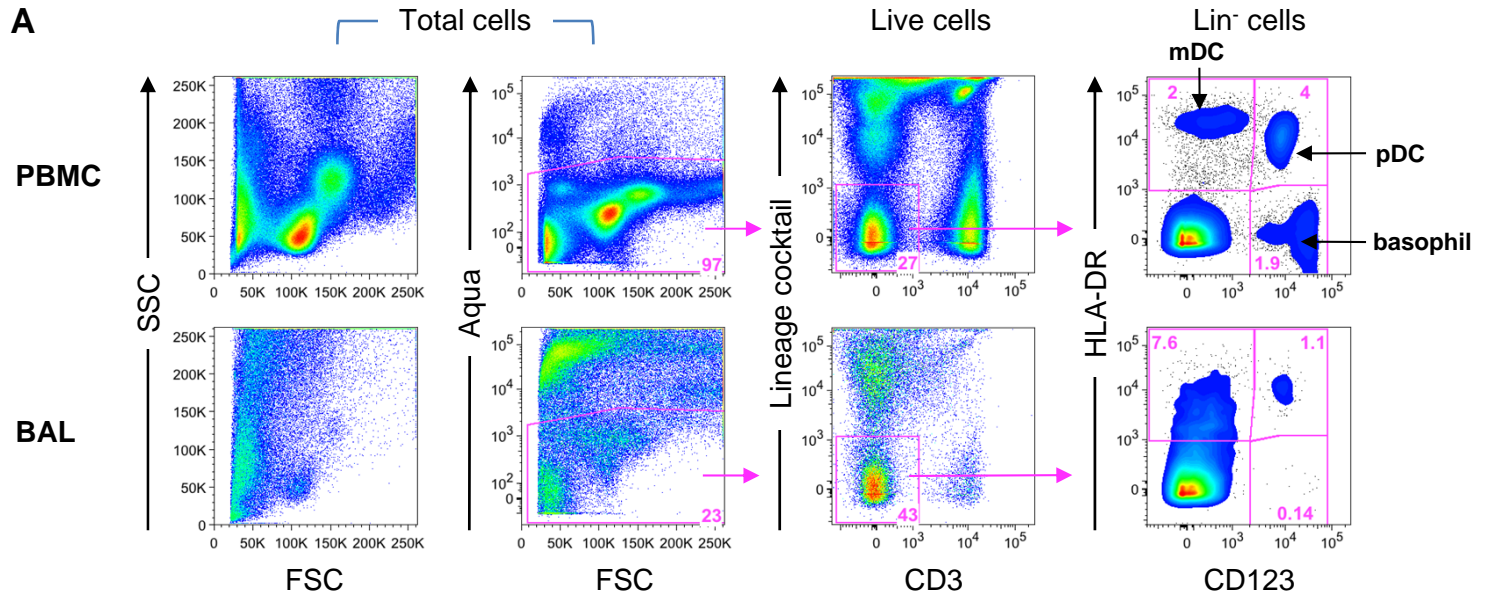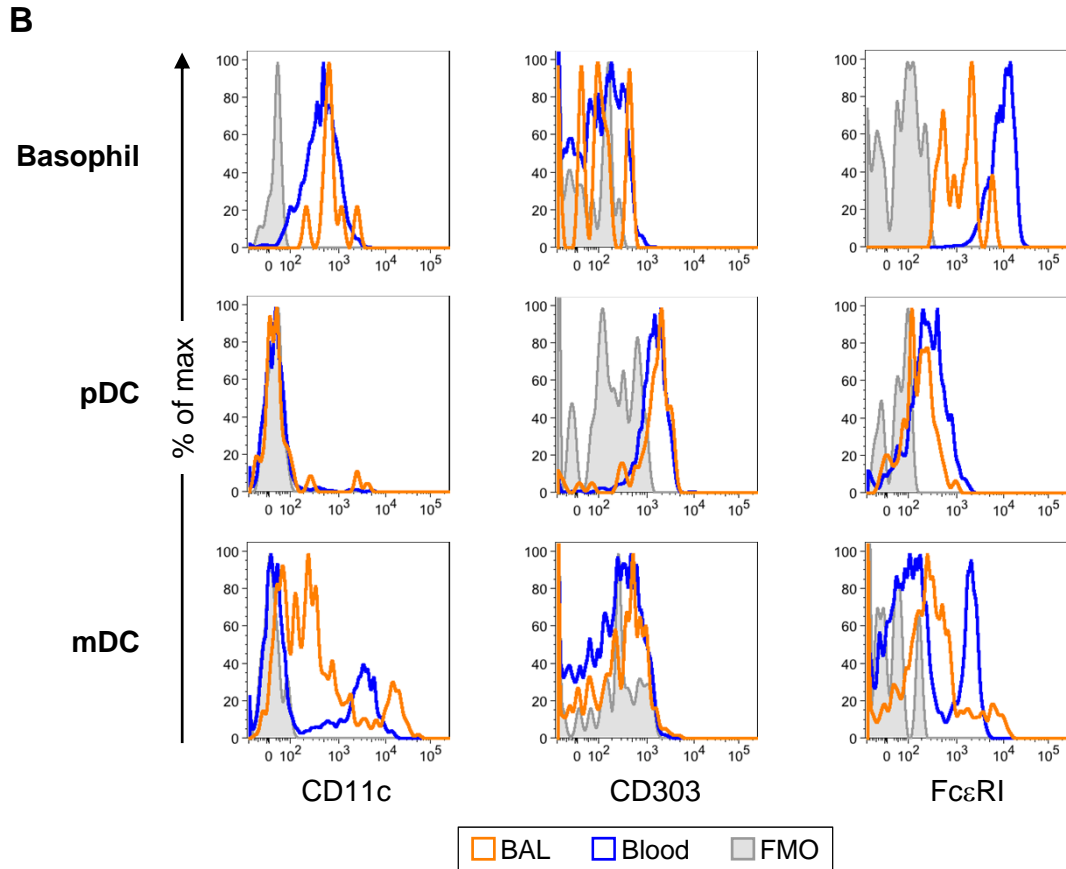

Figure E9
